# Supplementary material for: mCSM-AB2: guiding rational antibody design using graph-based signatures
Source: Oxford University Press journal article supplement (doi:10.1093/bioinformatics/btz779), 2019-10-24
Supplement: bioinformatics_36_5_1453_s4.pdf [file bioinformatics_36_5_1453_s4.pdf]

## **SUPPLEMENTARY DATA**

### **mCSM-AB2: Guiding Rational Antibody Design Using Graph-Based Signatures**

Yoochan Myung<sup>1,2,3</sup>, Carlos H.M. Rodrigues<sup>1,2,3</sup>, David B. Ascher<sup>1,2,3,4,\*</sup>, Douglas E.V. Pires<sup>1,2,3,5,\*</sup>

<sup>1</sup>Department of Biochemistry and Molecular Biology, Bio21 Institute, University of Melbourne, Melbourne, Victoria 3010, Australia

<sup>2</sup>ACRF Facility for Innovative Cancer Drug Discovery, Bio21 Institute, University of Melbourne, Melbourne, Victoria 3010, Australia

<sup>3</sup>Structural Biology and Bioinformatics, Baker Heart and Diabetes Institute, Melbourne, Victoria 3004, Australia

<sup>4</sup>Department of Biochemistry, University of Cambridge, CB2 1GA, UK

<sup>5</sup>School of Computing and Information Systems, University of Melbourne, Melbourne, Victoria 3010, Australia

**Table S1.** Mutations from same Ab-antigen complexes in mCSM-AB2 dataset.

| <b>PDB ID</b> | <b># of forward mutations</b> |                                |
|---------------|-------------------------------|--------------------------------|
|               | <b>AB-BIND</b>                | <b>Experimental blind-test</b> |
| 1BJ1          | 19                            | 10                             |
| 1CZ8          | 19                            | 1                              |
| 1JRH          | 2                             | 41                             |
| 1N8Z          | 28                            | 6                              |
| 1VFB          | 38                            | 8                              |
| 1YY9          | 5                             | 11                             |
| 2JEL          | 43                            | 1                              |
| 2NYY          | 28                            | 3                              |
| 3BN9          | 34                            | 1                              |
| 3HFM          | 21                            | 52                             |
| 3NGB          | 11                            | 30                             |

**Table S2.** Predictive performance of individual feature classes in mCSM-AB2 regression model.

| Class              | Feature                                     | Pearson's correlation<br>(RMSE (Kcal/mol)) |                              |                              |
|--------------------|---------------------------------------------|--------------------------------------------|------------------------------|------------------------------|
|                    |                                             | 10-fold CV                                 | 5-fold CV                    | Jackknife                    |
| Structure-based    | $\Delta$ Relative solvent accessibility     | 0.16<br>(10.92)                            | 0.16<br>(11.36)              | 0.16<br>(11.05)              |
| Energy-based terms | FoldX score                                 | 0.26<br>(6.61)                             | 0.24<br>(7.41)               | 0.29<br>(5.89)               |
| Structure-based    | $\Delta$ Distance to interface <sup>a</sup> | 0.26<br>(6.64)                             | 0.25<br>(6.99)               | 0.27<br>(6.43)               |
| Structure-based    | Distance pattern                            | 0.20<br>(8.94)                             | 0.17<br>(10.42)              | 0.20<br>(9.06)               |
| Sequence-based     | PSSM score                                  | 0.42<br>(3.95)                             | 0.42<br>(3.95)               | 0.41<br>(3.97)               |
| Structure-based    | $\Delta$ Pharmacophore count                | 0.50<br>(3.12)                             | 0.49<br>(3.19)               | 0.50<br>(3.11)               |
| Structure-based    | $\Delta$ Arpeggio contacts <sup>b</sup>     | 0.60<br>(2.44)                             | 0.59<br>(2.45)               | 0.60<br>(2.42)               |
| Structure-based    | Graph-based signatures                      | 0.65<br>(2.14)                             | 0.64<br>(2.19)               | 0.65<br>(2.09)               |
| <b>All</b>         | <b>mCSM-AB2</b>                             | <b>0.73</b><br><b>(1.68)</b>               | <b>0.72</b><br><b>(1.72)</b> | <b>0.73</b><br><b>(1.70)</b> |

<sup>a</sup>The closest distance between a mutation site and its binding partner.

<sup>b</sup>Interatomic interactions.

**Table S3.** Performance comparison among 8 different algorithms.

| Algorithm              | Pearson     | RMSE (Kcal/mol) | Pearson (90%) | RMSE (90%) (Kcal/mol) |
|------------------------|-------------|-----------------|---------------|-----------------------|
| <b>Extra Trees</b>     | <b>0.73</b> | <b>1.68</b>     | <b>0.84</b>   | <b>1.14</b>           |
| Random forest          | 0.70        | 1.85            | 0.83          | 1.28                  |
| XGBOOST                | 0.68        | 1.93            | 0.78          | 1.32                  |
| Gradient boost         | 0.68        | 1.96            | 0.77          | 1.31                  |
| Adaboost               | 0.61        | 2.37            | 0.73          | 1.88                  |
| Support vector machine | 0.13        | 13.92           | 0.11          | 2.71                  |
| K-nearest neighbors    | 0.02        | 105.47          | 0.18          | 60.11                 |
| Gaussian regression    | 0.02        | 91.18           | 0.01          | 3.01                  |

**Table S4.** Performance comparison between mCSM-AB2 models, before and after including features derived from modelled mutant structures.

| Method                  | Pearson's Correlation<br>(RMSE (Kcal/mol)) |                         |                       |
|-------------------------|--------------------------------------------|-------------------------|-----------------------|
|                         | Training                                   | Blind Test              |                       |
|                         | AB-BIND                                    | Experimental Structures | Homology Models       |
| Without mutant features | 0.75<br>(RMSE = 1.58)                      | 0.62<br>(RMSE = 1.92)   | 0.72<br>(RMSE = 1.81) |
| With mutant features    | 0.76<br>(RMSE = 1.51)                      | 0.64<br>(RMSE = 1.85)   | 0.77<br>(RMSE = 1.66) |

**Table S5.** RMSD between wild-type crystal and modelled structures.

| <b>Wild-type</b>          | <b>Mutant model</b>          | <b>RMSD (Å)<br/>on single position</b> | <b>RMSD (Å) on<br/>all atoms</b> | <b>RMSD (Å)<br/>on C<math>\alpha</math></b> |
|---------------------------|------------------------------|----------------------------------------|----------------------------------|---------------------------------------------|
| Tyr32 of<br>1KIQ chain B  | Ala32Tyr of<br>1KIPchain B   | 0.87                                   | 0.17                             | 0.14                                        |
| Tyr101 of<br>1KIP chain B | Phe101Tyr of<br>1KIQ chain B | 0.87                                   | 0.17                             | 0.14                                        |
| Ser50 of<br>1KIP chain A  | Tyr50Ser of<br>1KIR chain A  | 0.35                                   | 0.15                             | 0.13                                        |
| Phe33 of<br>1XGU chain B  | Ala33Phe of<br>1XGP chain B  | 0.53                                   | 0.19                             | 0.17                                        |
| Val33 of<br>1XGQ chain B  | Ala33Val of<br>1XGP chain B  | 1.01                                   | 0.16                             | 0.13                                        |
| Leu33 of<br>1XGT chain B  | Ala33Leu of<br>1XGP chain B  | 0.44                                   | 0.15                             | 0.13                                        |
| Ile33 of<br>1XGR chain B  | Ala33Ile of<br>1XGP chain B  | 0.27                                   | 0.14                             | 0.12                                        |
| <b>Average</b>            |                              | 0.62                                   | 0.16                             | 0.13                                        |
| <b>Standard deviation</b> |                              | 0.29                                   | 0.02                             | 0.02                                        |

**Table S6.** Performance of mCSM-AB2 stratified by wild-type and mutant amino acids residue types, considering forward and hypothetical reverse mutations.

| 10-fold cross validation results using the complete set of mutations (1810 mutations) |                                                                   |                                            |                                            |
|---------------------------------------------------------------------------------------|-------------------------------------------------------------------|--------------------------------------------|--------------------------------------------|
| Class (Wild-type to Mutant)                                                           | Pearson's correlation<br>RMSE (Kcal/mol)<br>(Number of mutations) |                                            |                                            |
|                                                                                       | Forward & hypothetical reverse mutations                          | Forward mutation                           | Reverse mutation                           |
| any to any                                                                            | <b>0.73</b><br>RMSE = <b>1.68</b><br>(1810)                       | <b>0.62</b><br>RMSE = <b>1.70</b><br>(905) | <b>0.59</b><br>RMSE = <b>1.66</b><br>(905) |
| non-ALA to ALA                                                                        | 0.73<br>RMSE = 1.58<br>(569)                                      | 0.72<br>RMSE = 1.58<br>(554)               | 0.83<br>RMSE = 1.38<br>(15)                |
| ALA to non-ALA                                                                        | 0.67<br>RMSE = 1.57<br>(569)                                      | 0.91<br>RMSE = 1.29<br>(15)                | 0.66<br>RMSE = 1.58<br>(554)               |
| non-ALA to non-ALA                                                                    | 0.55<br>RMSE = 1.85<br>(672)                                      | 0.46<br>RMSE = 1.90<br>(336)               | 0.48<br>RMSE = 1.81<br>(336)               |

**Table S7.** mCSM-AB2 performance on leave-one-complex-out cross-validation. Mutations were grouped by complex in a total of 60 groups. Each group was used as test set and the remaining used as training set. mCSM-AB2 on leave-one-complex-out cross-validation achieved a correlation of  $\rho = 0.70$ .

| <b>Group #</b> | <b>PDB ID</b> | <b>RMSE<br/>(Kcal/mol)</b> | <b># of mutation<br/>in complex</b> | <b># of outliers in<br/>training</b> | <b># of outliers in<br/>10-fold CV</b> |
|----------------|---------------|----------------------------|-------------------------------------|--------------------------------------|----------------------------------------|
| 1              | 1AHW          | 1.61                       | 18                                  | 2                                    | 2                                      |
| 2              | 1AK4          | 1.01                       | 32                                  | 0                                    | 0                                      |
| 3              | 1AO7          | 1.8                        | 10                                  | 1                                    | 2                                      |
| 4              | 1BJ1          | 1.75                       | 58                                  | 3                                    | 3                                      |
| 5              | 1CZ8          | 2.42                       | 40                                  | 7                                    | 7                                      |
| 6              | 1DQJ          | 2.36                       | 42                                  | 7                                    | 10                                     |
| 7              | 1DVF          | 1.96                       | 50                                  | 9                                    | 7                                      |
| 8              | 1FC2          | 1.94                       | 18                                  | 3                                    | 4                                      |
| 9              | 1FCC          | 1.06                       | 14                                  | 0                                    | 0                                      |
| 10             | 1FFW          | 0.65                       | 18                                  | 0                                    | 0                                      |
| 11             | 1JRH          | 2.08                       | 86                                  | 11                                   | 13                                     |
| 12             | 1JTG          | 1.88                       | 10                                  | 0                                    | 0                                      |
| 13             | 1KIP          | 2.05                       | 2                                   | 0                                    | 0                                      |
| 14             | 1KIQ          | 0.45                       | 2                                   | 0                                    | 0                                      |
| 15             | 1KIR          | 0.7                        | 2                                   | 0                                    | 0                                      |
| 16             | 1KTZ          | 1.09                       | 44                                  | 0                                    | 2                                      |
| 17             | 1MHP          | 2.42                       | 100                                 | 22                                   | 11                                     |



|    |      |      |    |    |    |
|----|------|------|----|----|----|
| 18 | 1MLC | 2.4  | 22 | 4  | 4  |
| 19 | 1N8Z | 1.33 | 68 | 2  | 2  |
| 20 | 1NCA | 1.66 | 8  | 0  | 0  |
| 21 | 1NMB | 1.82 | 16 | 3  | 3  |
| 22 | 1VFB | 2.09 | 92 | 15 | 13 |
| 23 | 1XGP | 1.63 | 8  | 0  | 0  |
| 24 | 1XGQ | 1.4  | 8  | 0  | 0  |
| 25 | 1XGR | 1.99 | 8  | 0  | 0  |
| 26 | 1XGT | 1.78 | 8  | 0  | 0  |
| 27 | 1XGU | 4.5  | 8  | 7  | 6  |
| 28 | 1YQV | 1.57 | 2  | 0  | 0  |
| 29 | 1YY9 | 1.45 | 32 | 2  | 4  |
| 30 | 2B2X | 0.47 | 6  | 0  | 0  |
| 31 | 2BDN | 1.29 | 24 | 0  | 3  |
| 32 | 2JEL | 1.7  | 88 | 8  | 10 |
| 33 | 2NYY | 1.85 | 62 | 8  | 4  |
| 34 | 2NZ9 | 2.41 | 38 | 6  | 3  |
| 35 | 2VIR | 3.64 | 4  | 3  | 2  |
| 36 | 2VIS | 3.96 | 2  | 2  | 1  |
| 37 | 3BDY | 1.67 | 68 | 8  | 5  |
| 38 | 3BE1 | 1.38 | 68 | 4  | 4  |
| 39 | 3BN9 | 1.5  | 70 | 4  | 4  |

|    |      |      |     |    |    |
|----|------|------|-----|----|----|
| 40 | 3G6D | 4.03 | 4   | 2  | 2  |
| 41 | 3HFM | 2.19 | 146 | 17 | 31 |
| 42 | 3K2M | 1.09 | 14  | 0  | 1  |
| 43 | 3L5X | 2.58 | 2   | 0  | 1  |
| 44 | 3LZF | 0.37 | 4   | 0  | 0  |
| 45 | 3N85 | 2.09 | 18  | 2  | 3  |
| 46 | 3NGB | 1.28 | 82  | 0  | 0  |
| 47 | 3NPS | 1.17 | 54  | 2  | 0  |
| 48 | 3SE8 | 1.56 | 56  | 2  | 2  |
| 49 | 3SE9 | 1.41 | 50  | 3  | 1  |
| 50 | 3W2D | 2.45 | 8   | 2  | 1  |
| 51 | 4GXU | 2.53 | 4   | 1  | 1  |
| 52 | 4I77 | 2.58 | 24  | 6  | 5  |
| 53 | 4JPK | 1.72 | 16  | 1  | 1  |
| 54 | 4KRL | 2.19 | 4   | 0  | 0  |
| 55 | 4KRO | 0.9  | 4   | 0  | 0  |
| 56 | 4KRP | 1.81 | 2   | 0  | 0  |
| 57 | 4NM8 | 1.82 | 18  | 2  | 3  |
| 58 | 4U6H | 1.78 | 4   | 0  | 0  |
| 59 | 4ZS6 | 1.45 | 4   | 0  | 0  |
| 60 | 5C6T | 1.33 | 36  | 0  | 0  |

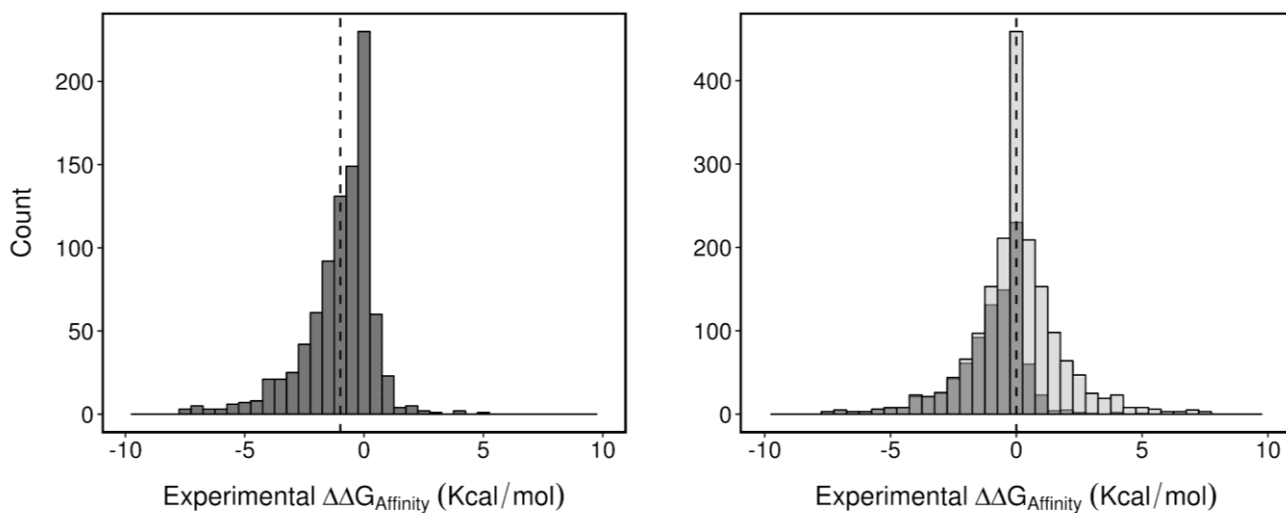

**Figure S1.** Distribution of experimental  $\Delta\Delta G_{Affinity}$  for the mCSM-AB2 data set. The distribution of the experimental  $\Delta\Delta G_{Affinity}$  for the 905 missense mutations is shown on the left, with an average of -1.00 Kcal/mol (mutation leading to a reduced affinity- dashed line). The graph on the right depicts the distribution of  $\Delta\Delta G_{Affinity}$  for the data set after 905 hypothetical reverse mutations are included, showing a balanced distribution (average of 0 Kcal/mol).

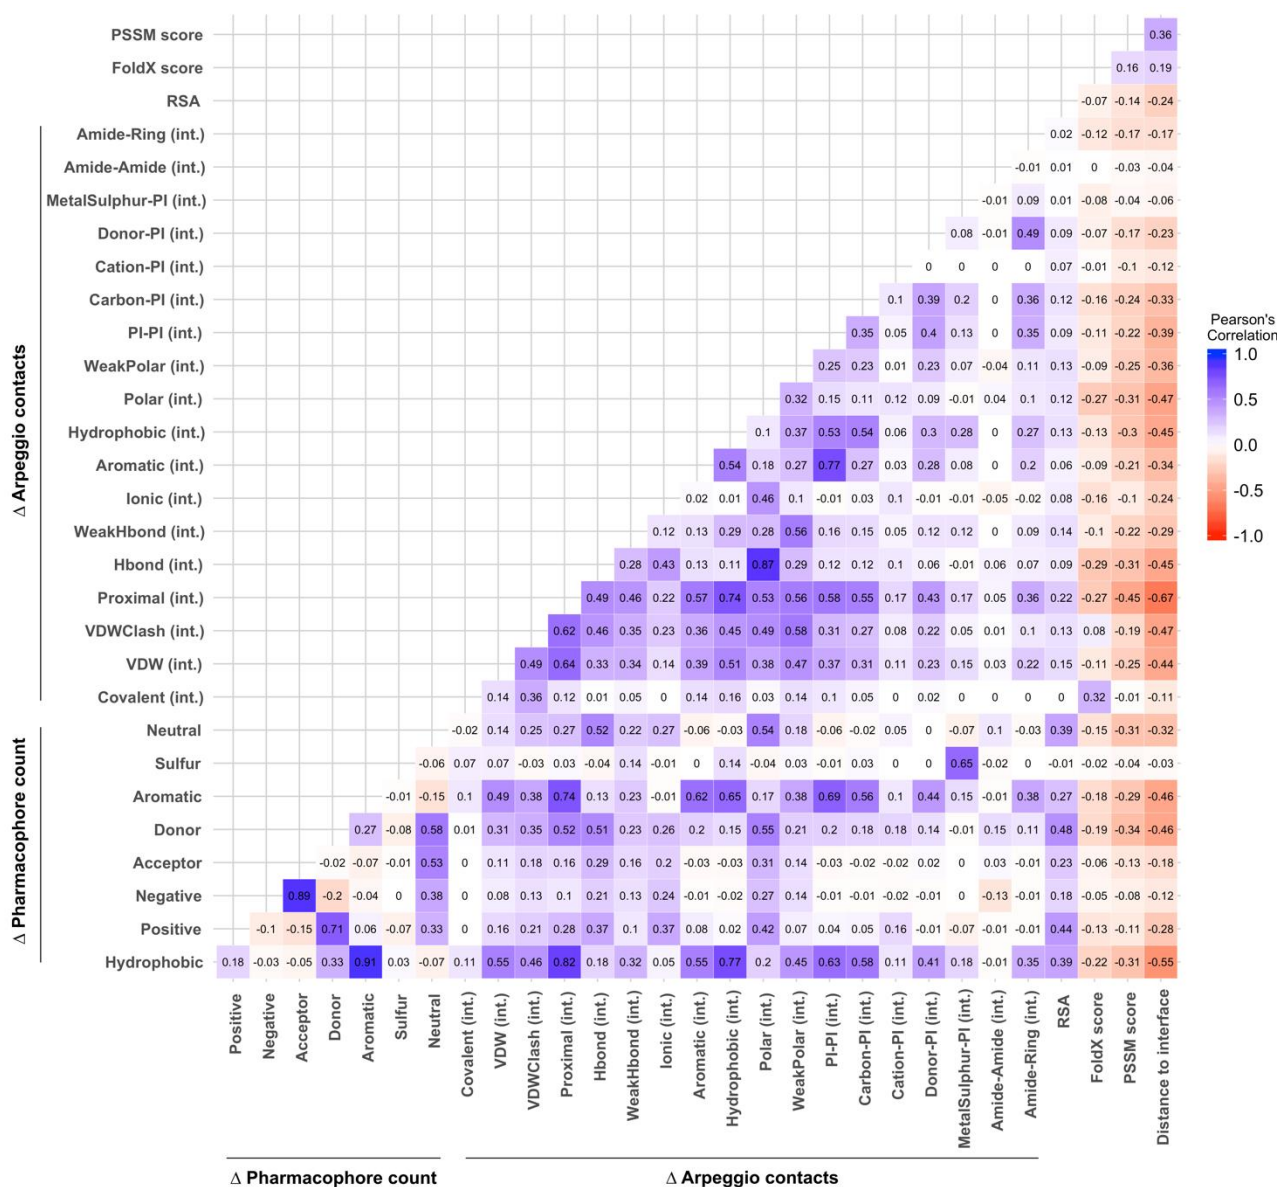

**Figure S2.** Pairwise associations among features used for mCSM-AB2. The heatmap is coloured by Pearson's correlation coefficient showing how features used in mCSM-AB2 are related to each other highlighting that, in general, there is little correlation between features, meaning there are no redundant feature pairs.

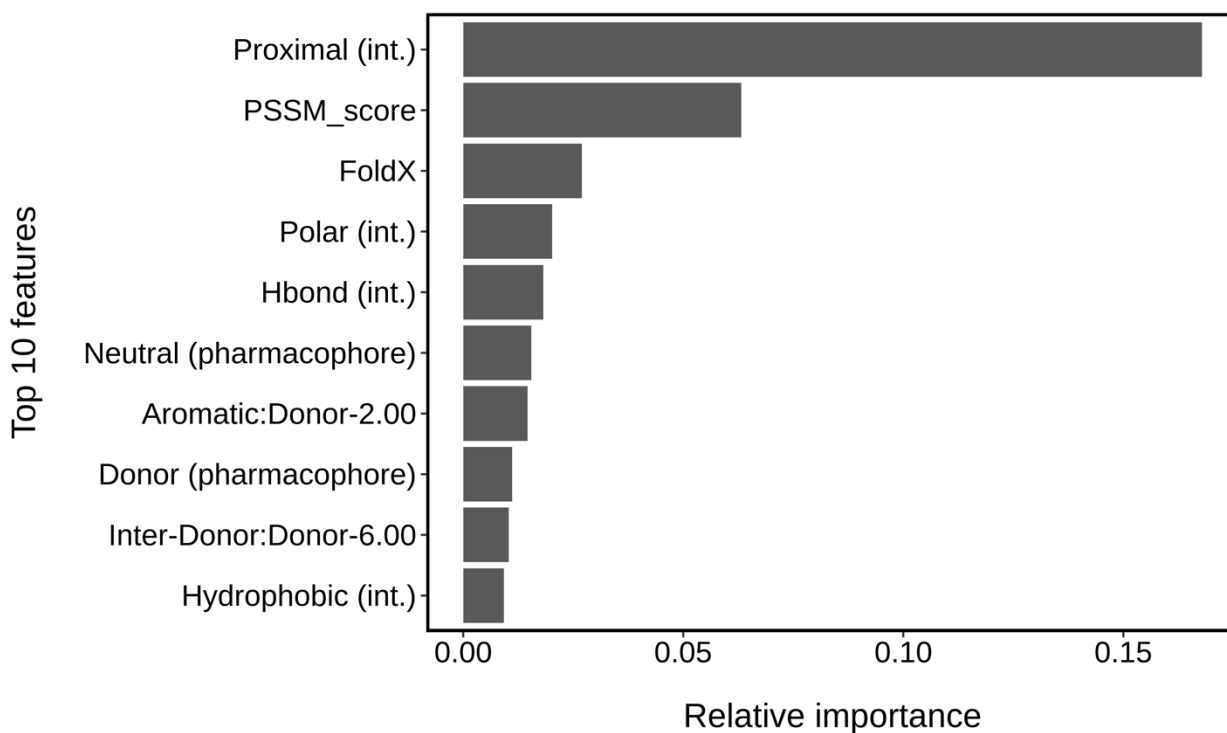

**Figure S3.** Relative importance of features. The relative importance based on Extra Trees algorithm shows the importance of individual features on the mCSM-AB2 model. The features with “(int.)” are changes of interatomic interaction between wild-type and mutant. The “Aromatic:Donor” and “Inter-Donor:Donor” are distance patterns which represents the geometry of surrounding environment of mutation site in wild-type at atomic level.

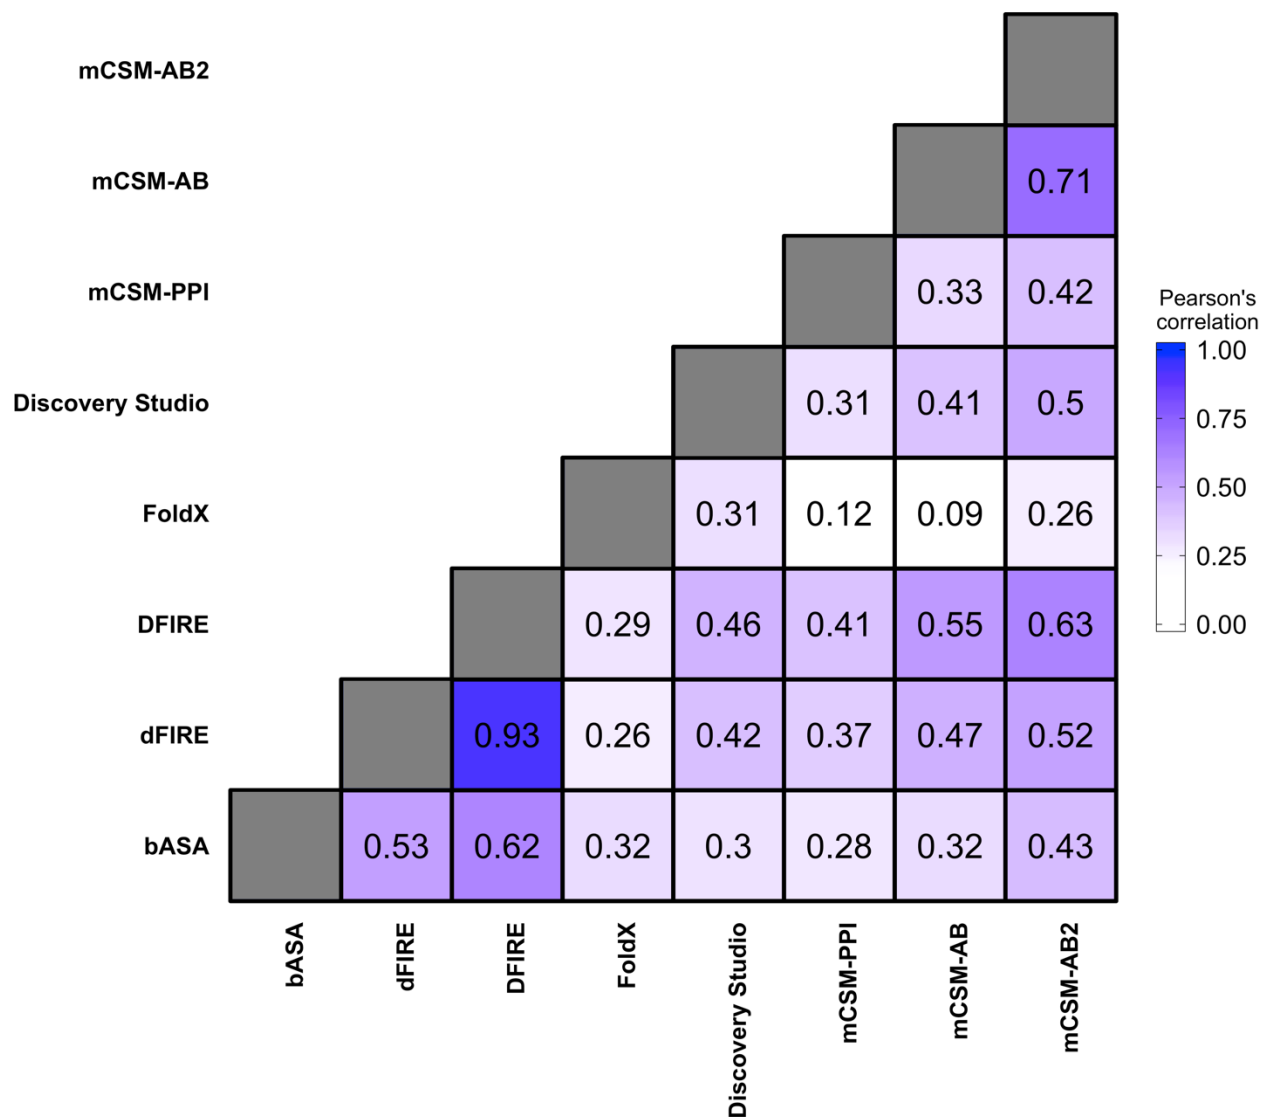

**Figure S4.** Pairwise correlation analysis of individual tools. The heatmap shows correlation between experimental  $\Delta\Delta G_{Affinity}$  and predicted  $\Delta\Delta G_{Affinity}$  of each method on the 754 non-redundant mutation data (blind test).

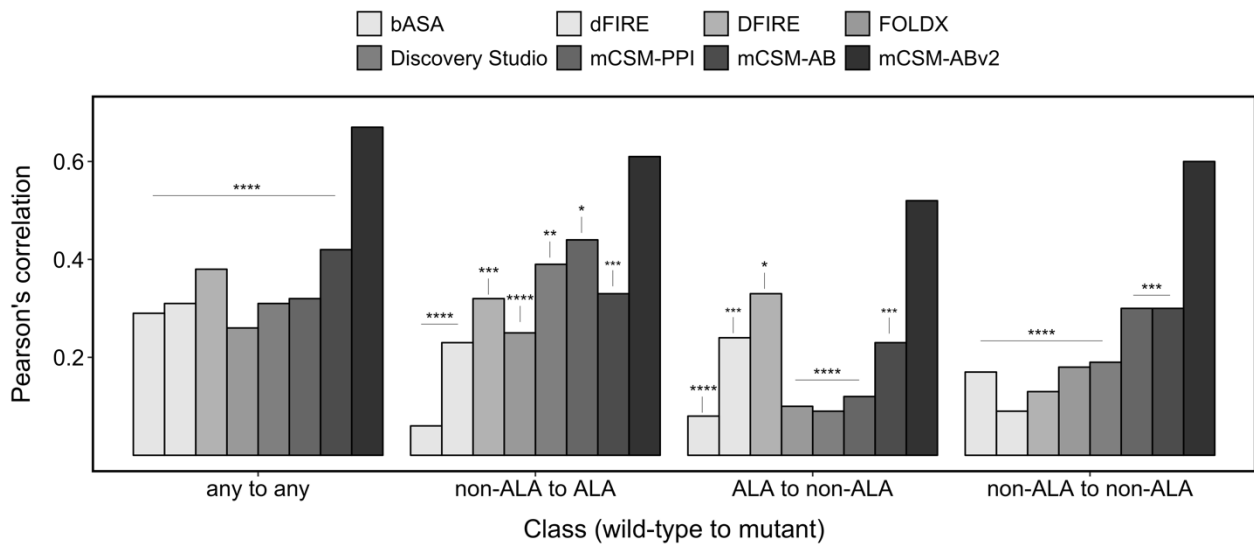

**Figure S5.** Performance comparison of individual tools considering different residue types. The individual methods were evaluated on the experimental blind test, and AB-BIND was used for building mCSM-AB and mCSM-AB2 predictive models. The *any to any* set (754 mutations) consists of non-ALA to ALA (216 mutations), ALA to non-ALA (216 mutations) and non-ALA to non-ALA (322 mutations) classes. Statistical significance of individual method was compared to mCSM-AB2 using Fisher's r-to-z transformation (\*  $p \leq 0.05$ , \*\*  $p \leq 0.01$ , \*\*\*  $p \leq 0.001$ , and \*\*\*\*  $p \leq 0.0001$ ).
